# Supplementary material
Source: PubMed Central journal article supplement (PMC1458933)

**A**

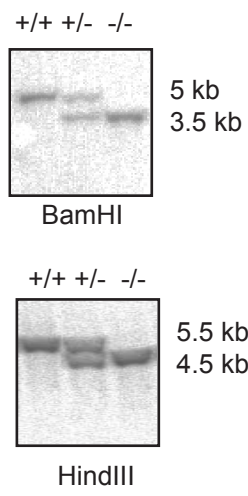

**B**

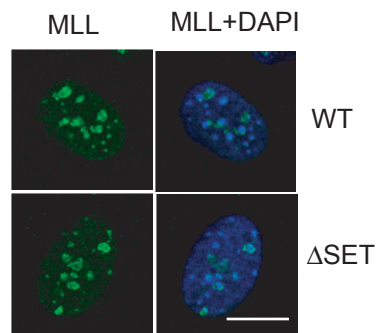

Supplement: pnas_0507425103_1.pdf [file pnas_0507425103_1.pdf]

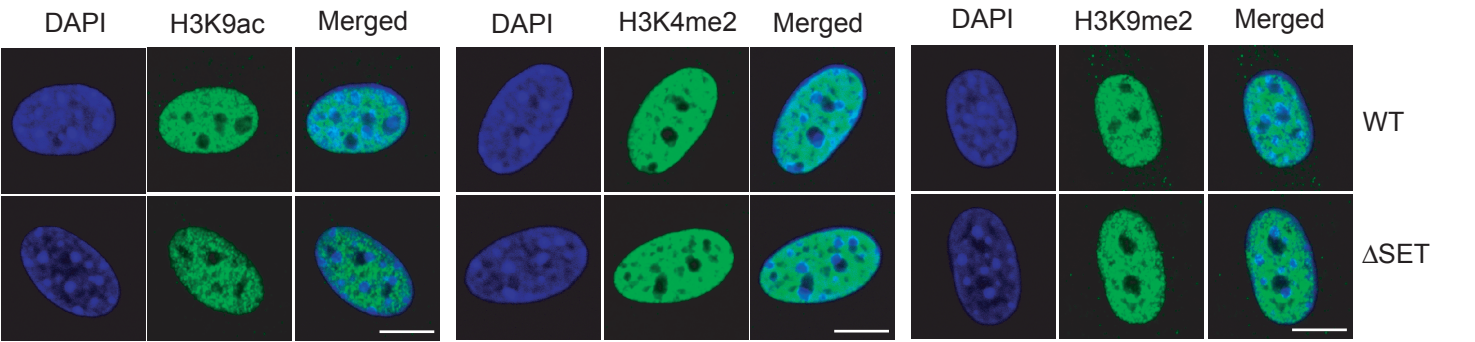

Supplement: pnas_0507425103_2.pdf [file pnas_0507425103_2.pdf]

**A**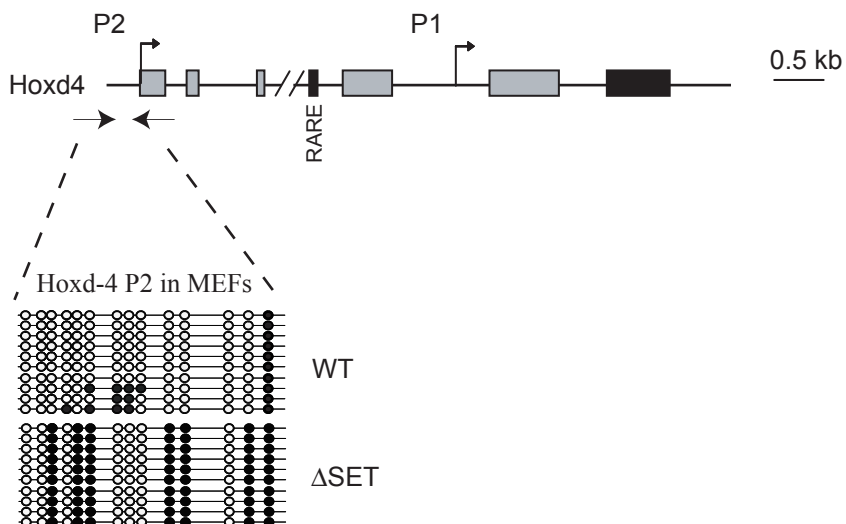**B**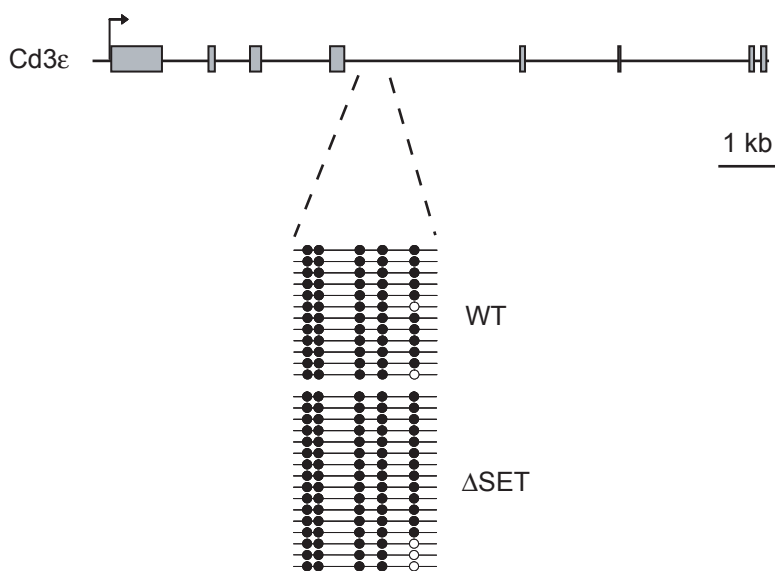**C**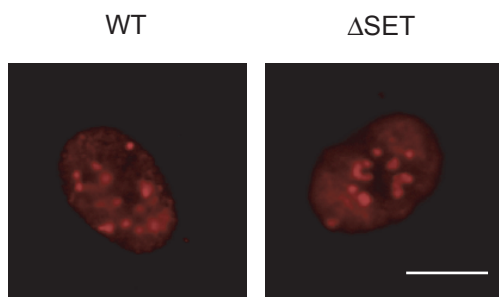

Supplement: pnas_0507425103_3.pdf [file pnas_0507425103_3.pdf]
